# Supplementary material for: Molecular dynamics simulations of the interaction between the surfaces of polar solids and aqueous solutions
Source: Royal Society of Chemistry journal article supplement (doi:10.1039/b600808a), 2006-01-01
Supplement: b600808a.pdf [file b600808a.pdf]

| <b>SPECIES</b>        |             |        |                                          |
|-----------------------|-------------|--------|------------------------------------------|
| Ion                   | Charges (e) |        | Core-shell<br>int. (eV Å <sup>-2</sup> ) |
|                       | Core        | Shell  |                                          |
| Iron (Fe)             | 3.000       | -      | -                                        |
| Chlorine (Cl)         | 1.485       | -2.485 | 29.38                                    |
| Sodium (Na)           | 1.000       | -      | -                                        |
| Oxygen (O)            | 0.210       | -2.210 | 27.4000                                  |
| Water Oxygen (Ow)     | 1.250       | -2.050 | 209.45                                   |
| Hydroxide Oxygen (Oh) | 0.900       | -2.300 | 74.9204                                  |
| Hydrogen (H)          | 0.400       | -      | -                                        |
| Calcium (Ca)          | 2.000       | -      | -                                        |
| Carbon (C)            | 1.135       | -      | -                                        |
| Carbonate Oxygen (Oc) | 0.587       | -1.632 | 507.4                                    |

| <b>BUCKINGHAM POTENTIALS</b> $A_{ij}\exp(-r_{ij}/\rho_{ij}) - (C_{ij}/r_{ij}^6)$ |               |                 |                               |
|----------------------------------------------------------------------------------|---------------|-----------------|-------------------------------|
| Ion pair ( <i>ij</i> )                                                           | $A_{ij}$ (eV) | $\rho_{ij}$ (Å) | $C_{ij}$ (eV Å <sup>6</sup> ) |
| Na-O                                                                             | 1226.840      | 0.3065          | -                             |
| Na-Oh                                                                            | 858.790       | 0.3065          | -                             |
| Na-Ow                                                                            | 2334.720      | 0.2387          | -                             |
| Na-Cl                                                                            | 2314.700      | 0.2903          | -                             |
| Fe-O                                                                             | 1102.400      | 0.3299          | -                             |
| Fe-Oh                                                                            | 771.400       | 0.3299          | -                             |
| Fe-Ow                                                                            | 440.800       | 0.3372          | -                             |
| Fe-Cl                                                                            | 738.400       | 0.4161          | -                             |
| H-O                                                                              | 396.270       | 0.2500          | -                             |
| H-Oh                                                                             | 311.970       | 0.2500          | -                             |
| Cl-O                                                                             | 1272.249      | 0.2352          | 34.99827                      |
| Cl-Oh                                                                            | 1272.249      | 0.2352          | 34.99827                      |
| Cl-Cl                                                                            | 1227.200      | 0.3214          | 29.06000                      |
| Oh-Oh                                                                            | 22764.30      | 0.1490          | 6.97                          |
| Oh-O                                                                             | 22764.30      | 0.1490          | 13.94                         |
| Oh-Ow                                                                            | 22764.30      | 0.1490          | 15.46                         |
| O-O                                                                              | 22764.30      | 0.1490          | 27.88                         |
| O-Ow                                                                             | 22764.30      | 0.1490          | 15.46                         |
| Ca-Oc                                                                            | 1550.0        | 0.2970          | -                             |
| Oc-Oc                                                                            | 16372.0       | 0.2130          | 3.47                          |
| C-Ow                                                                             | 435.00        | 0.3400          | 0.00                          |
| Ca-Ow                                                                            | 1186.60       | 0.2970          | 0.00                          |
| Oc-Ow                                                                            | 12533.60      | 0.2130          | 12.09                         |

  

| <b>LENNARD-JONES POTENTIALS</b> $(A_{ij}/r_{ij}^n) - (B_{ij}/r_{ij}^m)$ |                                      |                                      |          |          |
|-------------------------------------------------------------------------|--------------------------------------|--------------------------------------|----------|----------|
| Ion pair ( <i>ij</i> )                                                  | $A_{ij}$ (eV Å <sup><i>n</i></sup> ) | $B_{ij}$ (eV Å <sup><i>m</i></sup> ) | <i>n</i> | <i>m</i> |
| H-Ow                                                                    | 24.0                                 | 6.0                                  | 9        | 6        |
| H-Cl                                                                    | 147.01                               | 16.36                                | 9        | 6        |
| Cl-Ow                                                                   | 141959.17                            | 159.85                               | 12       | 6        |
| Ow-Ow                                                                   | 39344.98                             | 42.15                                | 12       | 6        |
| Hw-Oc                                                                   | 26.0                                 | 1.8                                  | 12       | 10       |

  

| <b>MORSE POTENTIALS</b> $D_{ij}(1 - \exp(-\alpha_{ij}(r_{ij} - r_0))) - D_{ij} - C_{ij}(Q_i Q_j / r_{ij})$ |               |                                  |           |              |
|------------------------------------------------------------------------------------------------------------|---------------|----------------------------------|-----------|--------------|
| Ion pair ( <i>ij</i> )                                                                                     | $D_{ij}$ (eV) | $\alpha_{ij}$ (Å <sup>-1</sup> ) | $r_0$ (Å) | $C_{ij}$ (%) |
| Oh-H                                                                                                       | 7.052500      | 3.17490                          | 0.92580   | 100          |
| Ow-H                                                                                                       | 6.203713      | 2.22003                          | 0.92376   | 50           |
| H-H                                                                                                        | 0.00          | 2.8405                           | 1.50000   | 50           |
| C-Oc                                                                                                       | 4.71          | 3.80                             | 1.18      | 0            |

| <b>THREE-BODY POTENTIALS</b> $(k_{ijk}/2)(\theta_{ijk} - \theta_0)^2$ |                            |              |     |
|-----------------------------------------------------------------------|----------------------------|--------------|-----|
| Ions                                                                  | $k$ (eV rad <sup>2</sup> ) | $\theta$ (°) |     |
| H-Ow-H                                                                | 4.19978                    | 108.69       |     |
| Oc-C-Oc                                                               | 1.69                       | 120          |     |
| <b>FOUR BODY POTENTIALS</b> $A[1 + \cos(m\phi_{ijkl} - \delta)]$      |                            |              |     |
| Ions                                                                  | $A$ (eV)                   | $\delta$ (°) | $m$ |
| Oc-C-Oc-Oc                                                            | 0.11290                    | 180          | 2.0 |
